# Supplementary material
Source: PubMed Central journal article supplement (PMC1512523)
Supplement: NIHMS10068-supplement-supp_1.pdf [file NIHMS10068-supplement-supp_1.pdf]

# Supporting Online Material

## *Materials and Methods*

### **Participant selection**

From the AREDS sample, we identified 96 case subjects who, at their most recent study visit, had either unioocular choroidal neovascularization (50 cases) or geographic atrophy either central or non-central to the macula (46 cases). The fellow eye of these case subjects was required to have at least one large drusen ( $>125\ \mu\text{m}$  in diameter), and total drusen area equivalent to a circle of at least  $1061\ \mu\text{m}$  in diameter. Controls were 50 individuals from the AREDS sample who had few or no drusen ( $< 63\ \mu\text{m}$  in diameter in each eye) for the duration of their participation in AREDS.

### **Genotyping**

We genotyped each individual using the Affymetrix GeneChip Mapping 100K Set of microarrays (*SI*). This mapping assay consisted of two chips (XbaI and HindIII) with approximately 50,000 SNPs each that were used for each individual. About 250 ng of genomic DNA was digested with two restriction enzymes XbaI and HindIII and processed according to the Affymetrix protocol (*SI*). The images were analyzed using GDAS software (Affymetrix). For the data obtained from each chip, two internal quality control measures were used: the call rate always exceeded 95% and heterozygosity on the X chromosome correctly identified the gender of the individual. To ensure that no

samples were confused, we checked that the 31 identical SNPs placed on both chips yielded the same genotype for the same individual.

To test the reproducibility of this system, we performed three experiments. First, 4 samples were processed twice with the Xba chips. Next, 2 replicates of a reference DNA positive control provided by Affymetrix were run on Xba chips alongside the samples described here. Finally, to test the accuracy of this assay, results for 3 individuals were compared with genotyping using the Affymetrix 10K SNP platform (S2).

To remove a SNP for which genotyping was consistently problematic, we required that it was called in at least 85% of the individuals. We then removed any SNP which was monomorphic in our data, as these SNPs are uninformative. Finally, we removed SNPs in which genotype frequencies deviated from the Hardy-Weinberg equilibrium expectation (HWD  $\chi^2 > 25$ ,  $P = 0.05$ , 1df, after Bonferroni correction) as being likely to contain genotyping errors. SNPs for which no homozygotes were observed in the entire sample were also likely due to errors and removed. Taken together, 105,980 SNPs with a call rate of at least 85%, both alleles observed, at least one homozygote observed, and a HWD  $\chi^2 \leq 25$  were considered for further analysis. Table S1 summarizes the quality and informativeness of the genotypes.

## Statistical analysis

To test for allelic association between each SNP and disease status, we constructed a 2×2 contingency table of allele frequencies. We then computed the Pearson  $\chi^2$  value and a  $P$ -value based on the central  $\chi^2$  distribution under the null hypothesis of no association with 1 degree of freedom. We corrected this nominal  $P$ -value for multiple testing by applying the Bonferroni criterion, in which the nominal  $P$ -value is multiplied by 103,581 (the number of autosomal SNPs that passed our quality control checks) to produce the Bonferroni-corrected  $P$ -value.

We used two methods of genomic control to look for population stratification, GC and GCF (S3). In the first method, we took the median  $\chi^2$  value for allelic association with a number of SNPs assumed to be unassociated with the disease (null SNPs). We then divided our test statistic  $\chi^2_{(1)}$  values by this median, and tested for significance using the  $\chi^2$  distribution. Alternatively, for the GCF method, we took the mean rather the median of the null  $\chi^2$  statistics, and tested significance of the quotient using the F(1,L) distribution, where L is the number of null SNPs used (S3). We used two different sets of unassociated SNPs: all the SNPs successfully genotyped except the two significant ones, and the set of 31 SNPs that are in common between the two chips used in the assay (see Genotyping section, above).

Odds ratios, confidence intervals, and population attributable risk were calculated as described in (S4). The population frequency of the alleles of interest is relatively high,

23% for and 41% for homozygous rs380390 and rs1329428, respectively. Therefore, the odds ratios necessarily calculated from the case control design study used here will overestimate (without changing the significance levels) the equivalent relative risk estimate needed to calculate lifetime risk. A prospective cohort study design will be necessary to provide valid estimates of lifetime risk in persons who have and have not inherited the alleles.

We defined the candidate region by looking for adjacent SNPs in which all four gametes were observed (S5) and bounding the region there. To look at linkage disequilibrium between SNPs in the candidate region, we inferred haplotype frequencies in the region using PHASE version 2.1 (S6, S7). Based on the inferred haplotype frequencies across the entire region, pairwise linkage disequilibrium was calculated by first computing the two-locus haplotype frequencies implied by the overall haplotype frequencies. The measure of linkage disequilibrium,  $D'$ , was then calculated using standard equations (S8) and plotted using the program GOLD (S9).

To define the smaller haplotype blocks within the 4-gamete region, we accessed the HapMap data website (<http://www.hapmap.org>) on December 15, 2004, and downloaded genotypes for SNPs in the region between SNPs rs10494744 and rs10484502. Genotypes for the CEU population (CEPH Utah population of northern and western European ancestry) were downloaded and visualized using Haploview version 3.0. Haplotype blocks were then defined using the method and parameters of Gabriel et al (S10).

Haplotypes across the narrower region defined by the HapMap block were also inferred using PHASE version 2.1. Haplotypes with an estimated frequency of at least 1% were considered for further analysis. Phylogenetic trees were built using the maximum parsimony of PHYLIP 3.62 (“dnapars” program). We then computed the odds ratio in a nested cladistic framework for the haplotypes (*S4, S11*).

### **Resequencing**

To resequence the CFH gene, we selected 96 individuals (66 cases and 30 controls). Most of these individuals were selected either because SNP rs380390 was homozygous (representing opposite risk groups) or SNP rs10272438 was not successfully genotyped (as we planned to use the same plates to re-sequence this SNP for genotyping). Three additional individuals were randomly selected to get the total of 96 for a full plate. Primer design, PCR amplification, bi-directional sequencing of PCR products, and mutation analyses were performed by Genaissance (New Haven, CT). A list of new variants identified and primers used is provided in Tables S4 and S5, respectively.

### **Immunofluorescence Microscopy for CFH**

#### *Tissue preparation*

Normal donor eyes were embedded in optimal cutting temperature compound (OCT; Miles Laboratory, Elkhart, IN), snap frozen, and stored at -70°C. Frozen retina sections were cut at 8 to 10 µm and placed on slides (Superfrost/Plus; Fisher Scientific, Fair

Lawn, NJ). All human eyes were obtained with the informed consent of the donors, and the research with human eyes was performed in accordance with the tenets of the Declaration of Helsinki and the Institutional Review Board (IRB).

### *Immunofluorescence Microscopy*

For immunofluorescence labeling, frozen sections of human retina were fixed in 4% paraformaldehyde in phosphate buffer saline (PBS) for 10 minutes. The tissue sections were blocked for 30 minutes with 5% normal donkey serum (Jackson ImmunoResearch, West Grove, PA), diluted in IC buffer (PBS, containing 0.2% Tween-20, 0.1% sodium azide), and incubated for 1 hour at room temperature with a goat anti-human Factor H antibody (Quidel, Santa Clara, CA) diluted 1:200 in staining buffer (IC buffer plus 1% normal donkey serum). Sections were washed repeatedly in IC buffer and incubated for 1 hour with the nuclear dye 4',6'-diamino-2-phenylindole (DAPI; 1  $\mu\text{g}/\text{mL}$ ) and Alexa-488 Donkey anti-goat antibodies (Molecular Probes, Eugene, OR) diluted 1:250 in staining buffer. After repeated washing with IC buffer, sections were covered in mounting medium (Gel Mount; Biomed, Foster City, CA) and coverslipped. For the control, the same concentration of anti-human factor H antibody was preincubated for 1 hour with purified human factor H protein (Calbiochem, La Jolla, CA) at the ratio of 3  $\mu\text{g}$  for 1  $\mu\text{l}$  of antibodies. The pretreated antibodies were then used to stain tissue sections as just described. Specimens were analyzed on a laser scanning confocal microscope (model SP2; Leica Microsystems, Exton, PA) equipped with Nomarski optics. Immunolabeled

and negative control sections were imaged under identical scanning conditions. Images were processed with Photoshop (Adobe Systems, San Jose, CA).

### **Immunohistochemistry for C5b-9**

#### *Source of tissue*

Post-mortem retinas from four donors were examined. Three were obtained through the Foundation Fighting Blindness (FFB) eye donor program. All of these had a clinical diagnosis of dry AMD. One pair of eyes embedded in paraffin was obtained from an 86 year old Caucasian female through the autopsy service of the Yale School of Medicine. No clinical history was available. Histologically, these retinas have multiple large or coalescing drusen with minimal RPE and photoreceptor loss consistent with a diagnosis of early AMD. Approval for research on human post mortem donor eyes was obtained from the Yale School of Medicine.

#### *Tissue processing and histology*

Upon enucleation, eyes were fixed in 4% paraformaldehyde, 0.5% glutaraldehyde in 0.1 M phosphate buffer for several days. The fixed eyes were transferred to 2% paraformaldehyde for storage. Six 0.5 cm circular punches were taken from each of the AMD donor eyes. Three of these were selected from the central retina at the junction of atrophic and more normal retina, and the remaining three from peripheral retina. Retinal plugs were embedded in paraffin and sections cut at 5 $\mu$ m.

### *Immunohistochemistry*

Following deparaffinization and rehydration, antigen retrieval was performed by boiling sections in a microwave oven for 10 minutes in 10mM sodium citrate (pH 6.0). Sections were allowed to cool for 20 minutes, prior to a 5-minute endogenous peroxidase block in 5% H<sub>2</sub>O<sub>2</sub>. Immunohistochemistry was performed using a mouse monoclonal antibody against human activated complement C5b-9 (Quidel Corporation, San Diego, CA, catalogue #A239). Primary antibody was applied at a concentration of 1:250 in 1X PBS. Biotinylated goat anti-mouse (cat # BA9200) secondary antibody (Vector, Burlingame, CA) was used at a concentration of 1:200. Nickel enhanced diaminobenzidine (DAB; cat # SK4100; Vector) was used to visualize bound antibody. Negative controls were obtained by omission of the primary antibody. Images were obtained with a Zeiss Axioplan microscope equipped with differential interference contrast lenses and a Zeiss Axiocam digital camera.



**Fig. S1.** Immunohistochemistry for activated complement C5b-9. Tissues from three patients are illustrated. **(A,B)** Postmortem fundus images from patients 1 and 2, respectively. The site illustrated histologically is indicated with an asterisk. **(C)** Tissue from patient 1 is immunopositive for C5b-9 throughout Bruch's membrane and in intercapillary pillars (thin black arrows). Overlying retinal pigment epithelium is hypertrophic, and associated retina demonstrated marked photoreceptor loss (not shown). Complement deposition is also present within the elastica of a choroidal artery (double headed black arrow), as well as within the walls of a choroidal vein (white arrow). **(D)** In patient 2, C5b-9 deposition is present in Bruch's membrane, intercapillary pillars (arrows) and drusen (asterisk). The internal aspect of a choroidal vein is also immunopositive (white arrow). **(E)** Tissue from patient 3, an 86-year old with histologic evidence of early AMD. Activated complement deposition is noted throughout Bruch's membrane, in drusen (asterisks) and in the internal wall of a choroidal vein (white arrow). Bar = 20  $\mu\text{m}$  (C, D); 15  $\mu\text{m}$  (E)

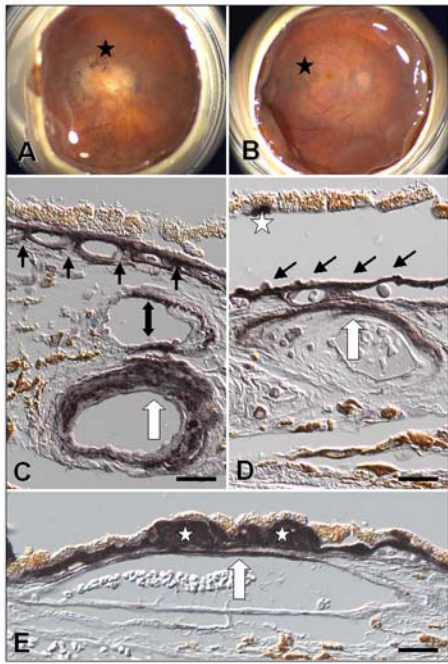

(Figure S1)

**Table S1.** Summary of sample phenotypes. There are 96 cases and 50 controls.

| Phenotype                      | Cases        | Controls     |
|--------------------------------|--------------|--------------|
| Males (%)                      | 44           | 54           |
| Never smoked (%)               | 36           | 52           |
| Formerly smoked (%)            | 58           | 48           |
| Currently smoke (%)            | 5            | 0            |
| Mean age ( $\pm$ s.d.) (years) | 79 $\pm$ 5.2 | 82 $\pm$ 2.2 |
| Age range (years)              | 65-89        | 78-87        |

**Table S2.** Quality control and informativeness statistics for genotyping. Descriptions of the quality control measures used can be found in the Materials and Methods section.

\*For the most part, when SNPs do not match it is due to one of the SNPs not being called. In only 3 out of 4485 comparisons is a mismatch observed, which is equivalent to 99.93% concordance.

| <b>Per-chip data quality</b>                                 |            |
|--------------------------------------------------------------|------------|
| Median call rate per chip                                    | 99.1%      |
| Minimum call rate per chip                                   | 95.6%      |
| Chips for which gender matches                               | 292 (100%) |
| <b>Per-individual data quality</b>                           |            |
| Median call rate per individual                              | 99.1%      |
| Minimum call rate per individual                             | 96.7%      |
| Average number of matches for common SNPs between two chips  | 30.7/31    |
| Minimum number of matches for common SNPs between two chips* | 28/31      |
| <b>Reproducibility</b>                                       |            |
| Xba Repeat concordance (4 replicates)                        | 99.886%    |
| Xba Positive control concordance (2 replicates)              | 99.870%    |
| 10K concordance (3 replicates)                               | 99.767%    |
| <b>Call rate (per-SNP)</b>                                   |            |
| Total number of SNPs                                         | 116204     |
| SNPs with 100% call rate                                     | 81456      |
| SNPs with call rate between 85% and 100%                     | 33262      |
| SNPs with call rate less than 85%                            | 1486       |
| <b>Locus Polymorphism</b>                                    |            |
| Number of SNPs with no polymorphism observed                 | 8538       |

Number of SNPs with minor allele frequency < 0.01 3604

Number of SNPs with only heterozygotes observed 19

Number of polymorphic SNPs with no heterozygotes observed 71

**Hardy-Weinberg Equilibrium**

Number of SNPs significantly out of equilibrium 231

**Table S3.** Haplotypes in the haplotype block that harbors the putative disease variant.

Haplotype frequencies are estimated using the program PHASE (S6, S7). The SNPs used to construct the haplotypes are the SNPs from the mapping microarrays found in the 41kb haplotype block defined by the HapMap data. Frequencies are the estimated frequency of each haplotype in the combined case and control population. The two SNPs that show association in the initial analysis are indicated in boldface.

| Name | rs2019727 | rs10489456 | rs3753396 | <b>rs380390</b> | rs2284664 | <b>rs1329428</b> | Frequency |
|------|-----------|------------|-----------|-----------------|-----------|------------------|-----------|
| N1   | A         | C          | T         | C               | C         | G                | 0.59      |
| N1   | A         | C          | T         | G               | C         | G                | 0.0068    |
| N3   | A         | C          | T         | G               | T         | A                | 0.12      |
| N4   | A         | T          | C         | G               | C         | G                | 0.15      |
| N5   | T         | C          | T         | G               | C         | A                | 0.12      |
| N6   | T         | C          | T         | G               | C         | G                | 0.0071    |

**Table S4.** New polymorphisms identified through resequencing. Location of each polymorphism refers to the position on GenBank accession AL049744.8. MAF is minor allele frequency.

| Region   | Position | Change | Type          | MAF      | AA Change   | rs Number |
|----------|----------|--------|---------------|----------|-------------|-----------|
| promoter | 120992   | A/G    | noncoding     | 0.005263 |             |           |
| promoter | 120865   | A/G    | noncoding     | 0.010526 |             |           |
| promoter | 120546   | C/T    | noncoding     | 0.242105 |             | rs3753394 |
| promoter | 120410   | T/C    | noncoding     | 0.005263 |             |           |
| promoter | 120294   | A/G    | noncoding     | 0.005263 |             |           |
| intron 1 | 99391    | C/T    | noncoding     | 0.117021 |             | rs511397  |
| exon 2   | 99242    | T/G    | nonsynonymous | 0.005319 | Ser 58 Ala  |           |
| exon 2   | 99230    | G/A    | nonsynonymous | 0.117021 | Val 62 Ile  | rs800292  |
| intron 2 | 99114    | G/A    | noncoding     | 0.005319 |             |           |
| intron 3 | 98283    | T/C    | noncoding     | 0.005263 |             |           |
| intron 3 | 98188    | T/G    | noncoding     | 0.005263 |             |           |
| exon 4   | 96315    | G/A    | nonsynonymous | 0.005263 | Arg 127 His |           |
| exon 7   | 87139    | A/C    | synonymous    | 0.415789 |             | rs1061147 |
| intron 7 | 83059    | T/C    | noncoding     | 0.005263 |             |           |
| intron 7 | 82966    | G/T    | noncoding     | 0.410526 |             | rs482934  |
| intron 7 | 82957    | A/G    | noncoding     | 0.005263 |             |           |
| exon 9   | 82232    | C/A    | nonsynonymous | 0.005208 | Gln 400 Lys |           |
| exon 9   | 82226    | C/T    | nonsynonymous | 0.414894 | His 402 Tyr | rs1061170 |
| intron 9 | 58652    | T/C    | noncoding     | 0.005319 |             |           |
| exon 10  | 58516    | G/A    | synonymous    | 0.22043  |             | rs2274700 |

|           |       |     |               |          |              |            |
|-----------|-------|-----|---------------|----------|--------------|------------|
| intron 10 | 58319 | A/G | noncoding     | 0.005319 |              | rs203678   |
| intron 10 | 58260 | C/G | noncoding     | 0.005319 |              |            |
| intron 10 | 56838 | G/T | noncoding     | 0.367021 |              | rs203674   |
| exon 12   | 47084 | G/A | nonsynonymous | 0.005263 | Val 609 Ile  |            |
| intron 12 | 46992 | T/G | noncoding     | 0.005208 |              |            |
| exon 13   | 45721 | A/G | synonymous    | 0.143617 |              | rs3753396  |
| exon 15   | 43875 | A/G | synonymous    | 0.005376 |              |            |
| intron 15 | 40549 | A/G | noncoding     | 0.215054 |              | rs7514261  |
| intron 15 | 40445 | C/T | noncoding     | 0.021277 |              |            |
| intron 15 | 40412 | G/C | noncoding     | 0.365591 |              | rs380390   |
| intron 15 | 40335 | G/C | noncoding     | 0.005319 |              | rs380060   |
| intron 15 | 40179 | C/T | noncoding     | 0.215054 |              | rs7540032  |
| intron 15 | 35577 | T/G | noncoding     | 0.005208 |              | rs435628   |
| intron 15 | 35537 | C/A | noncoding     | 0.357895 |              | rs375046   |
| intron 16 | 35263 | C/T | noncoding     | 0.005263 |              | rs428060   |
| exon 17   | 34821 | C/T | synonymous    | 0.026316 |              |            |
| exon 17   | 34786 | G/T | nonsynonymous | 0.005263 | Ser 890 Ile  | rs515299   |
| intron 17 | 31825 | A/C | noncoding     | 0.005319 |              |            |
| exon 18   | 31689 | G/T | nonsynonymous | 0.154255 | Glu 936 Asp  | rs1065489  |
| intron 18 | 30673 | T/G | noncoding     | 0.005556 |              | rs385892   |
| intron 18 | 30547 | T/C | noncoding     | 0.111702 |              | rs16840522 |
| intron 18 | 30546 | A/G | noncoding     | 0.005319 |              | rs385543   |
| exon 19   | 30396 | G/T | nonsynonymous | 0.005319 | Val 1007 Leu | rs534399   |
| intron 19 | 28886 | T/C | noncoding     | 0.154255 |              | rs513699   |
| exon 20   | 28877 | C/T | synonymous    | 0.154255 |              | rs513729   |



|           |       |     |               |          |              |
|-----------|-------|-----|---------------|----------|--------------|
| exon 20   | 28867 | A/T | nonsynonymous | 0.015957 | Asn 1050 Tyr |
| intron 20 | 28592 | A/G | noncoding     | 0.012987 |              |
| intron 20 | 26589 | G/C | noncoding     | 0.005618 |              |
| exon 22   | 25219 | C/A | nonsynonymous | 0.005556 | Pro 1166 Gln |
| exon 22   | 25088 | C/T | nonsynonymous | 0.005618 | Arg 1210 Cys |

**Table S5.** Primer sequences used in resequencing.

| Region    | Forward primer sequence    | Reverse primer sequence  |
|-----------|----------------------------|--------------------------|
| promoter  | AGAATCGTGGTCTCTGTGTGTGG    | AGCAGCTGGTGATATCCTCTGG   |
| promoter  | TCAAATGAGAGTGAGCCAGTTGC    | CTGTTCAACAACGTCCAGTTCTCC |
| exon 1    | GTGGGAGTGCAGTGAGAATTGG     | AACTCAACAATGTCAAAAGCC    |
| exon 2    | GATAGACCTGTGACTGTCTAGGC    | GGCAATAGTGATATAATTCAGGC  |
| exon 3    | ACCTCAGCCTCCCAAAGTGC       | TGCATACTGTTTTCCCACTCTCC  |
| exon 4    | AAGGAGGAGGAGAAGGAGGAAGG    | CAGGCTGCATTTCGTTTTTGG    |
| exon 5    | CCACTCCCATAGAAAAGAATCAGG   | ACTTCTTTGCACCAGTCTCTTCC  |
| exon 6    | GATAAATCATTTATTAAGCGG      | GAACCTTGAACACAGAAAATGC   |
| exon 7    | GGATGACTTTGGAGAAGAAGG      | TATGAGTTTCGGCAACTTCG     |
| exon 8    | TCATCTTCATTAACAAAGACC      | AGATCTATTTTGGTCACTTTCG   |
| exon 9    | CTTTGTTAGTAACTTTAGTTTCG    | TTATACACAGTTGAAAAACC     |
| exon 10   | GGCAACTCTGAGCTTATTTTCC     | AGAGTAGGAAAAGCCTGAATGG   |
| exon 11   | CATAGATTATTTTTGTACGG       | CAAAACTCCCTTCTTTTTCCC    |
| exon 12   | ATCTGATGCCCTCTGTATGACC     | ATTCAGTACTCAATACATGTCC   |
| exon 13   | CACCATTCTTGATTGTTTAGG      | GAATCTCCATAGTAATAAGG     |
| exon 14   | CAATGTGTTGATGGAGAGTGG      | ATTGAATTATAAGCAATATGC    |
| exon 15   | CATTCAGCGACAGAATACAGG      | GTGTGTGTGTGTGTGTGTGC     |
| intron 15 | AAGGCAGGAAAGTGTCTTATGC     | GTCAAATTAAGTAAAATCACC    |
| exon 16   | AACTGTTACACAGCTGAAAAG      | GTGGTGATTGATTAATGTGC     |
| exon 17   | GGTGGAGGAATATATCTTTGC      | ATAGAATAGATTCAATCATGC    |
| exon 18   | CGATAGACAGACAGACACCAGAAGG  | CAGCTATAATTTCCACAGCAGTCC |
| exon 19   | GTGTAATCTCAATTGCTACGGCTACC | CAAGTAGCTGGGACTTCAGATGC  |
| exon 20   | TAGTTTCATGTCTTTTTCTC       | GAATTTTAAGCACCATCAGTC    |

exon 21 CCAGGACTCATTCTTTCCACC

CTTCTGACAGAAATATTTGG

exon 22 TGATGTTTCTACATAGTTGG

GGAGTAAAACAATACATAAAAAATG

### *Supplementary Reference List*

- S1. H. Matsuzaki *et al.*, *Nature Methods* **1**, 109 (2004).
- S2. H. Matsuzaki *et al.*, *Genome Res.* **14**, 414 (2004).
- S3. B. Devlin, S. A. Bacanu, K. Roeder, *Nature Genet.* **36**, 1129 (2004).
- S4. P. Armitage, G. Berry, J. N. S. Matthews, in *Statistical Methods in Medical Research*. (Blackwell Scientific Publications, Oxford, 2002) pp. 671-685.
- S5. R. R. Hudson, N. L. Kaplan, *Genetics* **111**, 147 (1985).
- S6. M. Stephens, P. Donnelly, *Am. J. Hum. Genet.* **73**, 1162 (2003).
- S7. M. Stephens, N. J. Smith, P. Donnelly, *Am. J. Hum. Genet.* **68**, 978 (2001).
- S8. B. Devlin, N. Risch, *Genomics* **29**, 311 (1995).
- S9. G. R. Abecasis, W. O. Cookson, *Bioinformatics* **16**, 182 (2000).
- S10. S. B. Gabriel *et al.*, *Science* **296**, 2225 (2002).
- S11. A. R. Templeton, E. Boerwinkle, C. F. Sing, *Genetics* **117**, 343 (1987).
